# Supplementary material for: Identification of Prognostic Biomarkers of Potential Hub Genes in Urothelial Carcinoma and Function in Microenvironment
Source: Research Square preprint supplement (doi:10.21203/rs.3.rs-502631/v2), 2021-07-23
Supplement: Supplementary file 1 [file ec4591198076d16affe55fdf.docx]

Supplementary Table 3: The mRNA levels of the hub genes in invasive and superficial urothelial carcinoma at transcriptome level (ONCOMINE).

| **Gene Symbol** | **Type** | **Fold change** | ***P*-value** | ***t*-test** |
| --- | --- | --- | --- | --- |
| COL1A1 | Bladder Urothelial Carcinoma | 3.114 | 1.22E-10 | 8.851 |
|  | Bladder Urothelial Carcinoma | 1.514 | 9.85E-11 | 7.034 |
|  | Bladder Urothelial Carcinoma | 5.403 | 1.24E-5 | 5.234 |
| COL1A2 | Bladder Urothelial Carcinoma | 4.749 | 1.65E-7 | 6.177 |
|  | Bladder Urothelial Carcinoma | 2.269 | 4.08E-9 | 6.198 |
|  | Bladder Urothelial Carcinoma | 3.835 | 1.14E-4 | 4.309 |
| COL3A1 | Bladder Urothelial Carcinoma | 4.702 | 1.02E-8 | 6.557 |
|  | Bladder Urothelial Carcinoma | 1.832 | 3.11E-10 | 6.675 |
| COL5A1 | Bladder Urothelial Carcinoma | 3.538 | 5.70E-13 | 8.786 |
|  | Bladder Urothelial Carcinoma | 3.375 | 1.45E-4 | 4.484 |
| MMP9 | Bladder Urothelial Carcinoma | 19.679 | 5.91E-5 | 5.114 |
|  | Bladder Urothelial Carcinoma | 3.221 | 1.58E-6 | 5.195 |
|  | Bladder Urothelial Carcinoma | 3.965 | 2.05E-4 | 4.582 |
| POSTN | Bladder Urothelial Carcinoma | 1.771 | 3.34E-13 | 8.124 |
|  | Bladder Urothelial Carcinoma | 11.171 | 1.34E-16 | 11.242 |
|  | Bladder Urothelial Carcinoma | 8.471 | 6.19E-9 | 6.768 |
| SPP1 | Bladder Urothelial Carcinoma | 6.269 | 8.59E-6 | 5.876 |
|  | Bladder Urothelial Carcinoma | 7.160 | 1.37E-10 | 7.554 |
|  | Bladder Urothelial Carcinoma | 6.229 | 1.19E-14 | 8.810 |
|  | Bladder Urothelial Carcinoma | 6.194 | 3.94E-4 | 4.016 |
| THBS2 | Bladder Urothelial Carcinoma | 2.818 | 3.22E-9 | 7.125 |
|  | Bladder Urothelial Carcinoma | 3.783 | 1.68E-9 | 7.098 |
| VCAN | Bladder Urothelial Carcinoma | 5.606 | 2.18E-5 | 4.617 |
|  | Bladder Urothelial Carcinoma | 3.424 | 9.51E-13 | 9.200 |
|  | Bladder Urothelial Carcinoma | 3.248 | 5.04E-4 | 3.747 |
